# Supplementary material
Source: PubMed Central journal article supplement (PMC5203976)
Supplement: NIHMS799411-supplement-Supp_Table_S1-S2.pdf [file NIHMS799411-supplement-Supp_Table_S1-S2.pdf]

# Pharmacokinetics and Safety Assessment of L-Tetrahydropalmatine in Cocaine Users: A Randomized, Double-blind, Placebo Controlled Study

Hazem E. Hassan, and Deanna Kelly

**Table S1. Medication Side Effects in Adult Male Cocaine Users**

|                    | L-THP (N=12*) | Placebo (N=11**) |
|--------------------|---------------|------------------|
| Diarrhea           | 1             | 0                |
| Cough              | 1             | 0                |
| Nasal Congestion   | 1             | 0                |
| Headache           | 2             | 3                |
| Nausea             | 1             | 1                |
| Stiffness          | 1             | 0                |
| Malaise            | 1             | 2                |
| Contact dermatitis | 1             | 0                |
| Loss of Appetite   | 1             | 1                |
| Sedation           | 1             | 4                |
| Sneezing           | 1             | 1                |
| Dizziness          | 1             | 3                |
| Restlessness       | 3             | 1                |
| Sore throat        | 2             | 0                |
| Fatigue            | 1             | 0                |
| Tinnitus           | 1             | 0                |
| Constipation       | 1             | 0                |
| Toothache          | 1             | 0                |
| Dry mouth          | 0             | 3                |
| Euphoria           | 0             | 1                |
| Excess salivation  | 0             | 2                |
| Itching            | 0             | 1                |
| Insomnia           | 0             | 1                |
| Lower back pain    | 0             | 1                |

\* includes one participant who contributed two sets of data; once as a non-completer withdrawn on Day 3 and once as a completer

\*\* Subject X was not included in the analysis as this subject discontinued on Day 1

**Table S2. Vital Signs and ECG QTcB intervals in 20 Adult Cocaine-Using Men following intranasal cocaine (40 mg) administration to subjects pretreated with L-THP or Placebo**

|                                        | <b>L-THP (N=10)</b> | <b>Placebo (N=10)</b> | <b>p-value</b> |
|----------------------------------------|---------------------|-----------------------|----------------|
| <b>Systolic Blood Pressure (mmHg)</b>  |                     |                       |                |
| Baseline                               | 124.0 ± 11.6        | 120.7 ± 15.8          |                |
| Maximum change from baseline           | 17.1 ± 10.8         | 22.3 ± 12.1           | 0.32           |
| <b>Diastolic Blood Pressure (mmHg)</b> |                     |                       |                |
| Baseline                               | 69.5 ± 9.6          | 73.0 ± 5.5            |                |
| Maximum change from baseline           | 11.0 ± 6.6          | 9.5 ± 6.2             | 0.60           |
| <b>Heart Rate (bpm)</b>                |                     |                       |                |
| Baseline                               | 72.2 ± 6.9          | 78.6 ± 15.3           |                |
| Maximum change from baseline           | 10.5 ± 11.4         | 11.9 ± 8.5            | 0.76           |
| <b>QTcB interval (msec)</b>            |                     |                       |                |
| Baseline                               | 408.6 ± 21.3        | 418.7 ± 19.1          |                |
| Maximum change from baseline           | 19.1 ± 15.6         | 13.4 ± 9.5            | 0.34           |

Subjects received 3.5 days of L-THP (30 mg po bid) or placebo and cocaine challenge on morning of the 4<sup>th</sup> day

QTcB = QTc interval with Bazett's correction
